# Supplementary material for: Rational design of MXene-based single atom catalysts for Na–Se batteries from sabatier principle
Source: Royal Society of Chemistry journal article supplement (doi:10.1039/d3cp02150e), 2023-01-01
Supplement: d3cp02150e1.pdf [file d3cp02150e1.pdf]

## *Supporting information for*

# **Rational Design MXene-based Single Atom Catalysts for Na-Se Batteries from Sabatier Principles**

Chunlei Wei <sup>ab‡</sup>, MengMeng Ge <sup>ab‡</sup>, Timing Fang <sup>a\*</sup>, Xiao Tang <sup>a</sup>, Xiaomin Liu <sup>a\*</sup>

<sup>a</sup> *School of Chemistry and Chemical Engineering, Qingdao University, Qingdao 266071, Shandong, China*

<sup>b</sup> *College of Materials Science and Engineering, Qingdao University, Qingdao 266071, Shandong, China*

<sup>‡</sup> *These authors contributed equally to this work.*

\*Corresponding author: [fangtiming@gmail.com](mailto:fangtiming@gmail.com); [liuxiaomin@qdu.edu.cn](mailto:liuxiaomin@qdu.edu.cn);

## **Content lists**

**Table S1.**  $E_{ads}$  of  $Se_8/Na_2Se_n$  on different  $M_2CO_2$  or Zn- $M_2CO_2$  MXene

**Table S2.**  $\Delta G$  (Gibbs free energy) for each step of the SeRR on  $M_2CO_2/Zn-M_2CO_2$  hosts. The rate-limiting step of SeRR was write in bold.

**Figure S1.** The diffusion energy barrier of zinc atom on the surface of MXene.

**Figure S2.** Adsorption energies of  $Se_8/Na_2Se_n$  adsorbed on EC/DMC electrolytes.

**Figure S3.** Geometrical structures of  $Se_8/Na_2Se_n$  adsorbed on (a) EC and (b) DMC electrolytes.

**Figure S4.** Geometrical structures and adsorption energies of  $Se_8/Na_2Se_n$  interact with two solvent molecules.

## *Additional Computational methods*

### *The calculation of electron density difference (EDD)*

The charge transfer between  $\text{Se}_8/\text{Na}_2\text{Se}_n$  and  $\text{M}_2\text{CO}_2/\text{Zn-M}_2\text{CO}_2$  hosts was investigated by electron density difference (EDD). The EDD is expressed according to the following equation

$$\Delta\rho = \rho_{\text{hosts} - \text{Se}_8/\text{Na}_2\text{Se}_n} - \rho_{\text{hosts}} - \rho_{\text{Se}_8/\text{Na}_2\text{Se}_n} \quad (\text{S1})$$

where  $\rho_{\text{hosts} - \text{Se}_8/\text{Na}_2\text{Se}_n}$  and  $\rho_{\text{hosts}}$ , are the total charge density of the system with and without  $\text{Se}_8/\text{Na}_2\text{Se}_n$ ,  $\rho_{\text{Se}_8/\text{Na}_2\text{Se}_n}$  represents the charge density of  $\text{Se}_8/\text{Na}_2\text{Se}_n$ , respectively.

### *The calculation of Gibbs free energy change ( $\Delta G$ ) of SeRR on $\text{M}_2\text{CO}_2/\text{Zn-M}_2\text{CO}_2$ surface.*

Overall, the SeRR during the discharge of Na-Se batteries could be written as following<sup>1,2</sup>

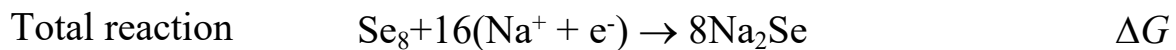

Each step involved in the generation is as follows:

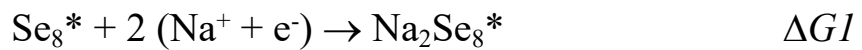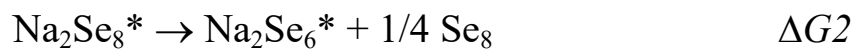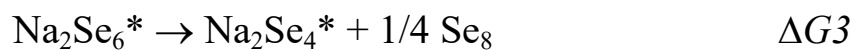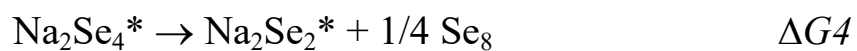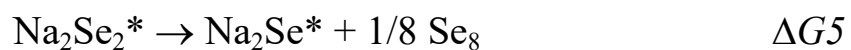

‘\*’ represents an active site on the catalytic substrate.

The Gibbs free energy ( $\Delta G$ ) for each SeRR during the Na-Se discharge process is calculated as

$$\Delta G = \Delta E + \Delta E_{ZPE} - T\Delta S \quad (\text{S2})$$

Where  $\Delta E$ ,  $\Delta E_{ZPE}$  and  $T\Delta S$  denotes the changes of total energy, the zero-point energy (ZPE) and entropic contribution, respectively. The ZPE and entropic contribution were calculated from the vibrational frequencies, and a temperature of 298 K was used.

**Table S1.**  $E_{ads}$  of  $Se_8/Na_2Se_n$  on different  $M_2CO_2$  or  $Zn-M_2CO_2$  MXene.

| Hosts         | $Se_8$ | $Na_2Se_8$ | $Na_2Se_6$ | $Na_2Se_4$ | $Na_2Se_2$ | $Na_2Se$ |
|---------------|--------|------------|------------|------------|------------|----------|
| $Ti_2CO_2$    | -1.274 | -3.273     | -2.327     | -2.630     | -2.994     | -2.667   |
| $Nb_2CO_2$    | -1.491 | -2.426     | -1.826     | -2.557     | -2.959     | -3.230   |
| $Cr_2CO_2$    | -1.798 | -4.604     | -4.174     | -4.436     | -5.301     | -5.224   |
| $Zn-Ti_2CO_2$ | -2.213 | -3.919     | -3.602     | -4.102     | -4.438     | -5.168   |
| $Zn-Nb_2CO_2$ | -2.588 | -4.228     | -3.608     | -3.984     | -4.496     | -5.281   |
| $Zn-Cr_2CO_2$ | -3.033 | -5.660     | -4.335     | -5.135     | -5.790     | -6.426   |

**Table S2.**  $\Delta G$  (Gibbs free energy) for each step of the SeRR on  $M_2CO_2/Zn-M_2CO_2$  hosts. The rate-limiting step of SeRR was write in bold.

| Hosts         | $\Delta G1$ | $\Delta G2$  | $\Delta G3$  | $\Delta G4$  | $\Delta G5$  |
|---------------|-------------|--------------|--------------|--------------|--------------|
| $Ti_2CO_2$    | -3.835      | <b>1.287</b> | -0.133       | 1.019        | 1.011        |
| $Nb_2CO_2$    | -3.156      | 0.683        | -0.058       | <b>0.893</b> | 0.551        |
| $Cr_2CO_2$    | -4.853      | 0.414        | 0.463        | 0.430        | <b>0.866</b> |
| $Zn-Ti_2CO_2$ | -3.857      | 0.405        | 0.159        | <b>0.991</b> | 0.014        |
| $Zn-Nb_2CO_2$ | -4.038      | 0.677        | 0.268        | <b>0.809</b> | -0.013       |
| $Zn-Cr_2CO_2$ | -4.784      | -0.169       | <b>1.454</b> | 0.632        | 0.151        |

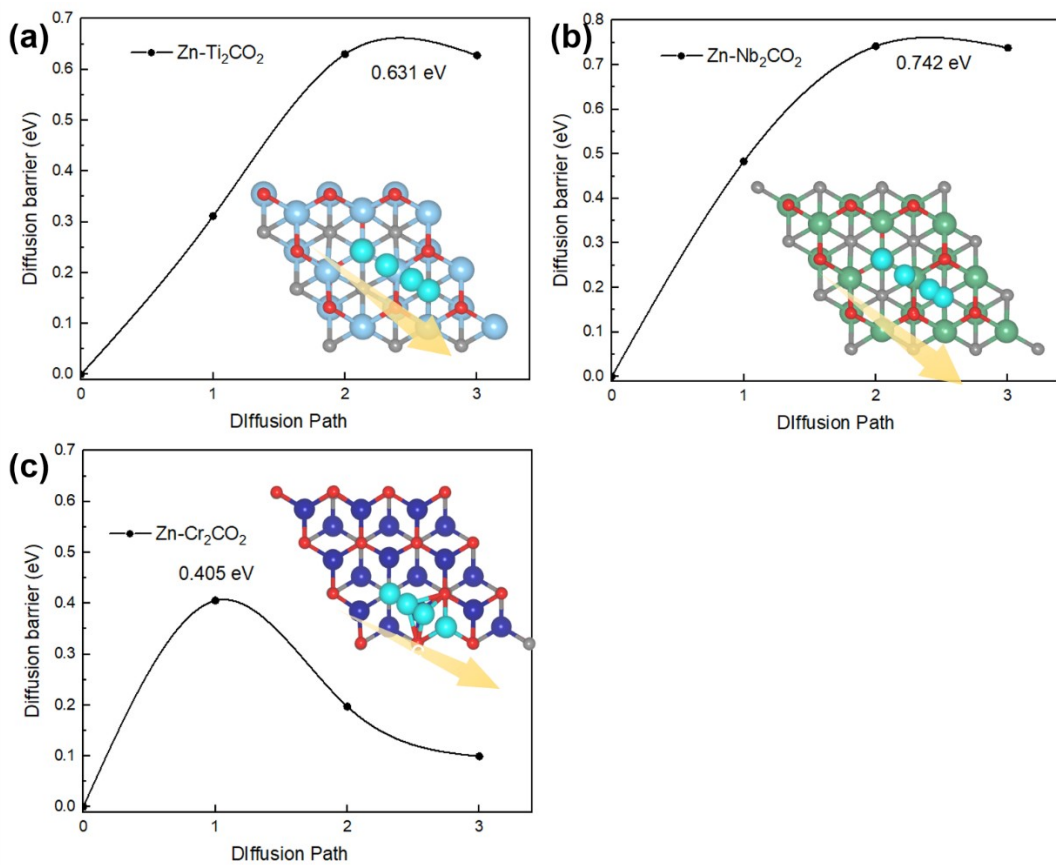

**Figure S1.** The diffusion energy barrier of zinc atom on the MXene surface.

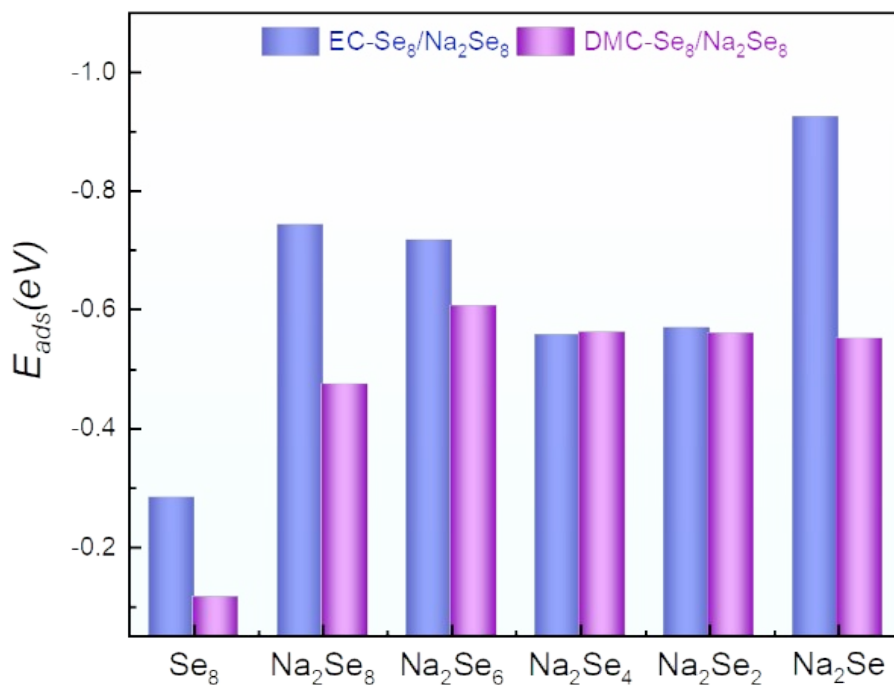

**Figure S2.** Adsorption energies of Se<sub>8</sub>/Na<sub>2</sub>Se<sub>n</sub> adsorbed on EC/DMC electrolytes.

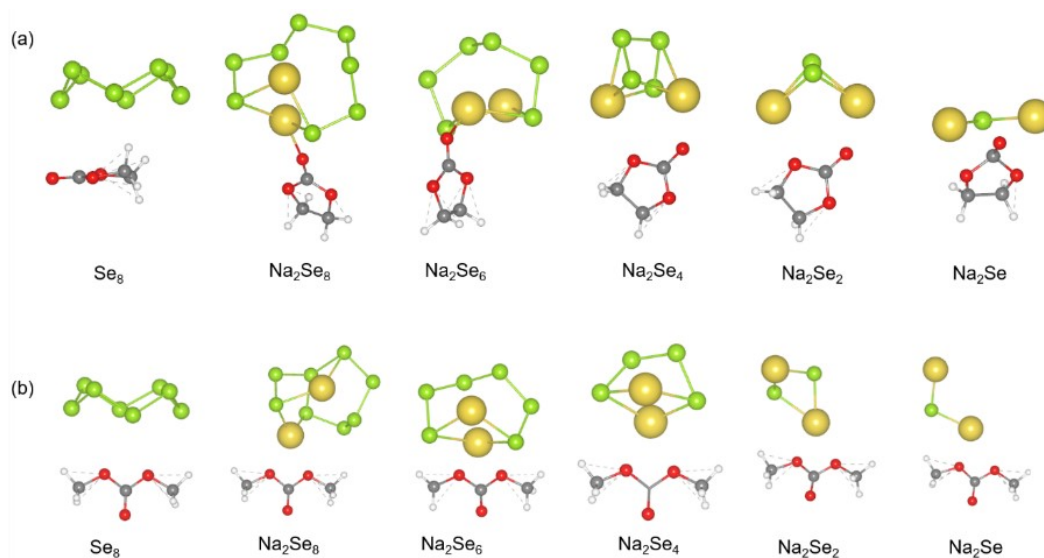

**Figure S3. Geometrical structures of  $\text{Se}_8/\text{Na}_2\text{Se}_n$  adsorbed on (a) EC and (b) DMC electrolytes.**

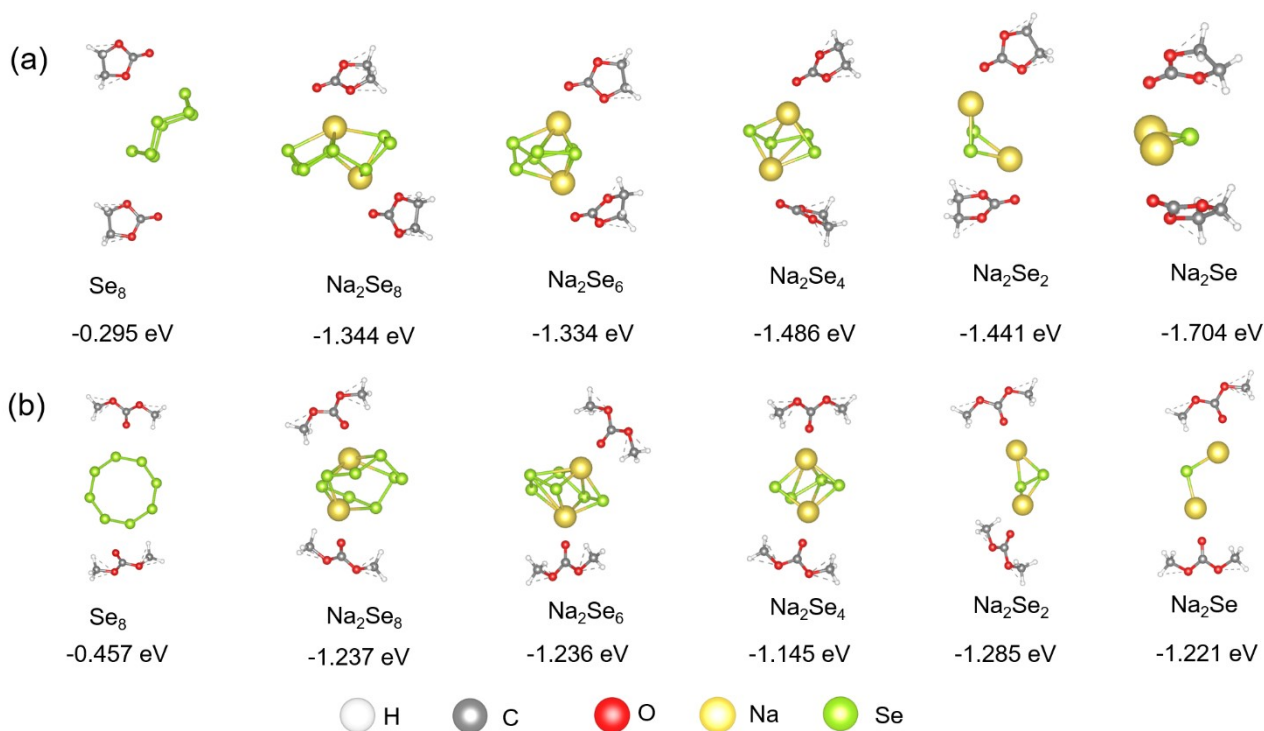

**Figure S4. Geometrical structures and adsorption energies of  $\text{Se}_8/\text{Na}_2\text{Se}_n$  interact with (a) two EC molecules and (b) two DMC molecules.**

## References

- [1] Q. Xu, T. Yang, W. Gao, R. Zhan, Y. Zhang, S. Bao, X. Li, Y. Chen, M. Xu, Jackfruit-like electrode design for advanced Na-Se batteries, *J. Power Sources*, 2019, **443**.
- [2] Q. Li, H. Liu, Z. Yao, J. Cheng, T. Li, Y. Li, C. Wolverton, J. Wu, V.P. Dravid, Electrochemistry of Selenium with Sodium and Lithium: Kinetics and Reaction Mechanism, *ACS Nano*, 2016, **10**, 8788-8795.
